**Towards a digital solution: Predicting public take-up of Singapore's contact tracing  
mobile application during the COVID-19 crisis**

Young Ern Saw<sup>1</sup>, Edina Y-Q Tan<sup>1</sup>, Jessica S Liu<sup>1</sup>, Jean CJ Liu<sup>1,2\*</sup>

<sup>1</sup>Division of Social Sciences, Yale-NUS College, 16 College Avenue West,  
Singapore 138527, Singapore

<sup>2</sup>Neuroscience and Behavioral Disorders Programme, Duke-NUS Medical School,  
8 College Road, Singapore 169857, Singapore

\*Address correspondence to:

Jean Liu

28 College Avenue West #01-501

Singapore 138533

Email: [jeanliu@yale-nus.edu.sg](mailto:jeanliu@yale-nus.edu.sg)

Phone: (+65) 6601 3694

### Highlights

- Worldwide, digital contact tracing has been introduced to control the spread of coronavirus disease 2019 (COVID-19).
- In a survey of 505 participants, we investigated sociodemographic factors predicting voluntary downloads of a contact tracing mobile application.
- Use of the contact tracing application was predicted by the extent to which an individual had modified his / her behaviors because of the outbreak.
- Network analyses revealed that application usage was associated with using hand sanitizers, avoiding public transport, and preferring outdoor over indoor venues.
- No demographic factor significantly predicted application usage.

### **Abstract**

In the global outbreak of coronavirus disease 2019 (COVID-19), new digital solutions have been developed for infection control. In particular, contact tracing mobile applications provide a means for governments to manage both health and economic concerns. As public reception is paramount to success, we conducted a systematic examination of socio-demographic characteristics that predict downloads of a contact tracing application. Participants were 505 adults who completed a web-based survey in Singapore, the site of the first contact tracing application (TraceTogether). We found that persons who had already changed their lifestyles on account of the pandemic were more likely to download the application. Network analyses revealed that contact tracing downloads was associated with using hand sanitizers, avoiding public transport, and preferring outdoor over indoor venues during the pandemic. However, demographic and situational characteristics were not significant predictors of application downloads. Together, these findings provide a base for policy makers to promote the uptake of digital contact tracing.

**Keywords:** Contact Tracing; COVID-19; Mobile Application; Digital Health; Epidemiology

## 1. Introduction

In May 2020, Google and Apple released the “Exposure Notification System” - an Application Programming Interface that logs: who a phone user has been in contact with, for how long, and at what distance (Etherington, 2020). This release came two months after the coronavirus disease 2019 (COVID-19) outbreak was categorized as a pandemic (World Health Organisation, 2020), allowing governments to identify and isolate contacts of confirmed cases through a process known as “contact tracing” (Ferretti et al., 2020; Hellewell et al., 2020).

Less than a year after the first reported cases, over 21 million individuals have tested positive for COVID-19 worldwide, and more than 700,000 have died (Worldometer, n.d.). To contain the spread, over half the global population has been subjected to lock-downs involving school closures, workplace shutdowns, and/or movement restrictions (Blanchard et al., 2020) Although these lockdowns are effective in tapering the epidemic curve (Lau et al., 2020), they are costly to the global economy and are unsustainable (Fernandes, 2020). On the flipside, however, allowing the coronavirus to spread unhindered can lead to an overwhelmed healthcare system and the severe loss of lives (Betsch et al., 2020; Legido-Quigley et al., 2020).

To address both infection control and economic concerns, several countries have turned to contact tracing to keep the economy open (Kretzschmar et al., 2020). Epidemiological modelling suggests that if: (i) cases are effectively identified (through rigorous testing protocols), (ii) contact tracing is comprehensive (identifying all possible exposure), and (iii) contacts are quarantined in a timely manner, this strategy can curb the spread of the virus (Hellewell et al., 2020; Kretzschmar et al., 2020). In the optimal scenario, 80% of contacts are traced on the same day the individual tests positive - a scenario likely to occur only if digital solutions are implemented (e.g., the use of mobile phone applications for contact tracing) (Ferretti et al., 2020; Kretzschmar et al., 2020). This, in turn, requires “buy-in” - the public’s willingness to adopt these solutions. Correspondingly, we sought in this paper to investigate socio-demographic characteristics that predict public adoption of digital

contact tracing. The outcomes of our study are vital, informing policymakers about the likelihood of success and presenting strategies they can undertake to boost uptake.

## **2. Literature Review**

### **2.1. Conventional Contact Tracing**

In the early days of the pandemic (and in previous infectious disease outbreaks), contact tracing was manual (Chen et al., 2007). For example, in the first quarter of 2020, the city-state Singapore organized interviews for each COVID-19 case, then traced their contacts through measures such as checking receipts or reviewing surveillance footage (Vaswani, 2020). In one instance, when a taxi driver tested positive, the local police reportedly traced his passenger by examining footage from 40 surveillance cameras, then knocked on every door within a housing estate to identify the contact (Mahmud, 2020).

Although this form of contact tracing was judged early on to be the 'gold standard' for case detection (Niehus et al., 2020), its labor-intensive format cannot scale up. In terms of logistics, contact tracers need one week to be trained, and are then expected to identify three contacts per hour (Rubin, 2020). Given that each positive case has 36 contacts on average (Keeling et al., 2020), this translates to 12 hours of tracing per case - a strategy that becomes ineffective as case numbers increase. On top of staffing limitations, a person who tests positive may also forget who they have been in contact with, undermining the effectiveness of the process (Kretzschmar et al., 2020).

As an alternative, technological advances provide novel solutions for contact tracing to be conducted - for example, via mobile phone applications that track Bluetooth signals from phones in the vicinity (Ferretti et al., 2020). As this method is not restrained by staffing or recall biases, it has the potential to capture contacts more comprehensively - particularly for casual contacts not readily brought to mind (Hellewell et al., 2020; Kretzschmar et al., 2020). Further, phone applications can notify individuals swiftly after a contact tests positive, allowing them to be isolated in a quicker manner (Ferretti et al., 2020).

### **2.2. Digital Contact Tracing**

To date, a number of contact tracing mobile applications have been developed - for

example, COVID-Watch in the United States (Morgan et al., 2020), COVIDSafe in Australia (Australian Government, 2020), and Corona-Warn-App in Germany (Reelfs et al., 2020). To estimate the efficacy of these applications, modelling studies have assessed parameters needed for the basic reproduction number  $R_0$  to fall below one (Ferretti et al., 2020; Hinch et al., 2020; Kretzschmar et al., 2020). As  $R_0$  refers to the number of infections caused by one positive case, a value less than one indicates that the virus has been contained. For this to be achieved, a contact tracing application would need to be downloaded by at least 56% of the population - or 80% of all smartphone users (as estimated in the United Kingdom) (Hinch et al., 2020).

Despite the potential of these applications, their introduction has been met with concerns regarding privacy and personal freedom. For example, mobile applications could retain information about close contacts regardless of the latter's consent, and personal information may be misused (Ienca & Vayena, 2020). Correspondingly, a survey by the Pew Research Centre found that 1 in 2 Americans deemed it unacceptable for governments to track citizen movement to manage the spread of COVID-19 (Anderson & Auxier, 2020). In turn, such mistrust can dampen the download rates of a contact tracing application.

### 2.3 Decentralized Versus Centralized Systems

The dilemma between privacy and protection has led to two forms of contact tracing applications — decentralized and centralized (Criddle & Kelion, 2020). Under both systems, randomly-generated user IDs are created and shared via Bluetooth with phones in close proximity. When individuals test positive for COVID-19, they then give their consent to add their user IDs to a database. Thereafter, the two systems diverge in how the matching and notification process unfolds.

For decentralized applications - thought of as providing more privacy to users - the database of users who test positive is routinely downloaded onto a smartphone to search for IDs the phone user may have had contact with (Abeler et al., 2020). If a match occurs, the user then receives an exposure notification sent at the level of the phone. As an example, Google and Apple's "Exposure Notification Service" uses this system (Google, n.d.).

In contrast, centralized applications carry out their matches outside the user's phone (Downey, 2020). First, the IDs of individuals who tested positive are sent to a centralized database alongside IDs of their close contacts. Here, the definition of matches can be customized, adapting - for example - based on additional information offered by the positive case (GovTech, 2020). Thereafter, an exposure notification is sent from the server to close contacts. Although this method comes with costs to users' privacy, it enables public health agencies to detect community spread. Correspondingly, it is the system used by several government-level applications (e.g., the COVIDSafe application developed by the Australian government; Australian Government, 2020).

#### 2.4. Understanding Predictors of Take-Up

Although two different systems have been developed to promote adoption, the global rate of downloads remains 9% on average (Chan, 2020) - far below the ideal levels needed for  $R_0$  to fall beneath one. To increase uptake, the Gulf state Qatar made it compulsory for residents to use the official application, imposing a fine of \$55,000 or imprisonment of 3 years for those who do not comply (Al Jazeera News, 2020). Given that most countries do not have this legislation, however, public health agencies would benefit from an improved understanding of sociodemographic factors that predict uptake (Thorneloe et al., 2020). In turn, this information can be used to encourage members of the public to opt-in.

In this paper, we conducted the first empirical study identifying characteristics of individuals who have voluntarily downloaded a contact tracing application. Our study was conducted in Singapore, where the first national-level application - 'TraceTogether' - was launched in March 2020 (Reuters, 2020). TraceTogether utilizes a centralized approach to contact tracing, with an open source protocol available to developers (Bay et al., 2020).

As Singapore was the forerunner of this technology, the application has accrued 2.3 million users in half a year - nearly 40% of Singapore's resident population, or 50% of all smartphone users (*TraceTogether*, 2020). Correspondingly, Singapore's position makes it a valuable case study to examine factors influencing the uptake of digital contact tracing. The study was conducted between April to July 2020, as the country entered and then exited a

lockdown (in April-May). In terms of the epidemic curve, this period covered a peak in daily COVID-19 cases (April: >1000/day, or 175 per million population) that tapered off with time (July: >100/day, or 17.5 per million population).

### **3. Methods**

#### **3.1. Data Collection**

Survey respondents were 505 adults who were at least 21 years old and had lived in Singapore for a minimum of 2 years. Participants responded to advertisements placed in online community groups (e.g., Facebook or WhatsApp groups for residential estates, universities, and workplaces), or to paid online advertisements targeting Singapore residents. Informed consent was obtained from participants in accordance with a protocol approved by the Yale-NUS College Ethics Review Committee (#2020-CERC-001) and pre-registered on ClinicalTrials.gov (NCT04468581).

All data collection took place between 3 April to 17 July 2020 - the second wave of data collection in a large survey tracking nation-wide responses to COVID-19. The full survey was administered via Qualtrics and took an average of 10 minutes to complete. This contained questions on: (i) overall reactions to the local pandemic situation; (ii) sources of COVID-19 news; (iii) time spent receiving COVID-19 news and/or discussing COVID-19 on social media; (iv) exposure to rumors; (v) how the individual has adapted to the pandemic (by adopting various behaviors); (vi) estimates regarding case numbers; and (vii) the presence of psychological symptoms (<https://osf.io/pv3bj>). The questions reported in this article were included in the fifth section, and findings from the first wave of data collection (planned prior to the launch of TraceTogether) has been described elsewhere (Liu & Tong, 2020; Long & Liu, 2020).

#### **3.2 Outcome Variable: Use of TraceTogether**

For the primary outcome variable, participants were asked to indicate if they had downloaded the government's contact tracing application TraceTogether (binary variable with 1 indicating that they had, and 0 indicating that they had not).

#### **3.3 Predictors**



### 3.3.1 Demographics

As predictors of TraceTogether usage, participants were first asked to report demographic data. Participants reported their: age (in years), gender, citizenship, ethnicity, marital status, educational level, house type (a proxy of socio-economic status in Singapore), as well as household size.

### 3.3.2 Situational variables

Based on the survey time-stamp, we also included as predictors: (i) the total number of cases in Singapore to date, and (ii) whether the nation was in a lock-down at the time of participation (0 = No, 1 = Yes).

### 3.3.3 Other Behavioral Changes

As a basis of comparison, participants were also asked to identify which of 18 other behavioral changes they had made as a result of the pandemic (apart from downloading the contact tracing application TraceTogether). Specifically, participants were asked whether they had: (1) washed their hands more frequently; (2) used hand sanitizers; (3) worn a mask in public voluntarily (before a law was passed); (4) avoided taking public transport; (5) stayed home more than usual; (6) avoided crowded places; (7) chosen outdoor over indoor venues; (8) missed or postponed social events; (9) changed their travel plans voluntarily; (10) reduced physical contact with others (e.g., by not shaking hands); (11) avoided visiting hospitals and/or healthcare settings; (12) avoided visiting places where COVID-19 cases had been reported; (13) kept a distance from people suspected of recent contact with a COVID-19 case; (14) kept a distance from people who might have recently travelled to countries with an outbreak; (15) kept a distance from people with flu symptoms; (16) relied more on online shopping (e.g., for groceries); (17) stored up more household and/or food supplies than usual; or (18) taken their children out of school. Each item was a binary measure such that 0 = measure was not taken and 1 = measure was taken. These values were then summed to compute an aggregated measure of behavioral change (out of 18), and were included as a predictor to assess whether contact tracing usage was associated with conventional behavioral changes one undertakes during an epidemic (Bali et al., 2016;

Vinck et al., 2019).

As part of the survey, participants were also asked to specify if they had changed their behaviors in any other way (1.8%,  $n = 9$ ) or if they had not changed their behaviors at all (0.4%,  $n = 2$ ). However, these were removed from statistical analyses due to the low base rate of affirmative responses.

#### 3.4. Data Analysis Plan

As the primary analysis, binary logistic regression was used to identify predictors of TraceTogether use. In the first model, participants' demographics were included as predictors (age, citizenship, gender, marital status, education level, ethnicity, household type, and household size). Citizenship (*base = others*), gender (*base = female*), marital status (*base = single*) and ethnicity (*base = Chinese*) were coded as dummy variables. In the second model, we repeated the first model with the inclusion of situational variables (the total number of COVID-19 cases to date, log-transformed; and lockdown status). Finally, in the third model, we repeated the second model but added the total number of behavioral modifications as a predictor. All data analyses were conducted via the statistical packages SPSS (Ver. 23) and R (3.6.0), with the type 1 decision-wise error rate controlled at  $\alpha = 0.05$ .

## 4. Results

### 4.1. Demographics of the Sample

Table 1. Baseline characteristics of survey respondents ( $N = 505$ )

| Variables                                | Mean     | SD    |
|------------------------------------------|----------|-------|
| Age (In Years)                           | 37.82    | 11.31 |
| Number of Behavioral Changes             | 9.81     | 3.82  |
|                                          | <i>n</i> | %     |
| Gender                                   |          |       |
| Female                                   | 313      | 62.0% |
| Male                                     | 192      | 38.0% |
| Citizenship                              |          |       |
| Singaporean                              | 456      | 90.3% |
| Others                                   | 49       | 9.7%  |
| Highest Education                        |          |       |
| No formal education                      | 2        | 0.4%  |
| Primary School (PSLE)                    | 2        | 0.4%  |
| Secondary School (O & N Level)           | 23       | 4.6%  |
| Junior College (A Level)                 | 26       | 5.1%  |
| Institution of Technical Education (ITE) | 12       | 2.4%  |
| Polytechnic (Diploma)                    | 88       | 17.4% |
| University (Degree)                      | 265      | 52.5% |
| Post-graduate (Masters / PhD)            | 87       | 17.2% |
| Ethnicity                                |          |       |
| Chinese                                  | 412      | 81.6% |
| Malay                                    | 38       | 7.5%  |
| Indian                                   | 32       | 6.3%  |
| Eurasian                                 | 15       | 3.0%  |
| Others                                   | 8        | 1.6%  |
| Marital Status                           |          |       |
| Single                                   | 170      | 33.7% |
| Dating                                   | 64       | 12.7% |
| Married                                  | 241      | 47.7% |
| Widowed / Separated / Divorced           | 30       | 5.9%  |
| Household type                           |          |       |
| HDB Flat: 1-2 rooms                      | 14       | 2.8%  |
| HDB Flat: 3 rooms                        | 50       | 9.9%  |
| HDB Flat: 4 rooms                        | 132      | 26.1% |
| HDB Flat: 5 rooms and/or executive flats | 149      | 29.5% |
| Condominium and/or private apartments    | 122      | 24.2% |
| Landed property                          | 38       | 7.5%  |
| Household size                           |          |       |
| 1                                        | 26       | 5.1%  |
| 2                                        | 88       | 17.4% |
| 3                                        | 119      | 23.6% |
| 4                                        | 133      | 26.3% |
| 5+                                       | 139      | 27.5% |

As shown in Table 1, our sample of 505 participants captured a wide range of demographics. Compared to the resident population, the sample was matched in: ethnic composition, household size, and housing type (a proxy of socio-economic status in Singapore) ( $\leq 10\%$  difference). However, participants were more likely to be female (62.0 vs. 51.1%), to be single/dating (46.4 vs. 31.6%), to have a higher level of education (12.9 vs. 51.7% without tertiary education), and to be a citizen of Singapore (90.3% vs. 61.4%). Conversely, participants were less likely to subscribe to Buddhism or Taoism (22.3 vs. 43.2%).

#### 4.2. Binary Logistic Regression

Of the 505 participants, 274 (54.3%, 95% CI: 49.8% - 58.7%) reported having downloaded TraceTogether, Singapore's contact tracing application. The download rate in this sample parallels that of smartphone users in the resident population.

Table 2 shows parameter estimates from logistic regression analyses predicting the use of TraceTogether. As can be seen, no demographic or situational variable significantly predicted downloads (Models 1 and 2). After controlling for these variables, the number of behavioral modifications emerged as a significant predictor (Model 3). Namely, with each unit increase in the number of behavioral modifications adopted, participants were 1.11 times more likely to download the contact tracing application ( $Z = 13.97$ ,  $p < .001$ ). Table 3 presents the characteristics of users and non-users of the TraceTogether application.

Table 2. Logistic regression models predicting the use of a contact tracing mobile application

| Predictors                              | Dependent Variable: Use of the Contact Tracing Application TraceTogether |                 |      |          |                                               |                 |      |          |                                                                          |                 |      |          |
|-----------------------------------------|--------------------------------------------------------------------------|-----------------|------|----------|-----------------------------------------------|-----------------|------|----------|--------------------------------------------------------------------------|-----------------|------|----------|
|                                         | Model 1: Demographics                                                    |                 |      |          | Model 2: Demographics & Situational Variables |                 |      |          | Model 3: Demographics, Situational Variables, & Behavioural Modification |                 |      |          |
|                                         | B                                                                        | CI              | Wald | <i>p</i> | B                                             | CI              | Wald | <i>p</i> | B                                                                        | CI              | Wald | <i>p</i> |
| Age (In Years)                          | .018                                                                     | 1.00 -<br>.1.04 | 2.96 | .09      | .019                                          | 1.00 -<br>.1.04 | 3.18 | .07      | .020                                                                     | 1.00 -<br>.1.04 | 3.38 | .07      |
| Gender ( <i>Base = Female</i> )         | -.260                                                                    | .53 -<br>1.12   | 1.85 | .17      | -.252                                         | .53 -<br>1.14   | 1.70 | .19      | -.123                                                                    | .60 -<br>1.31   | 0.38 | .54      |
| Citizenship ( <i>Base = Others</i> )    | -.605                                                                    | .26 -<br>1.14   | 2.61 | .11      | -.612                                         | .26 -<br>1.13   | 2.65 | .10      | -.522                                                                    | .28 -<br>1.26   | 1.83 | .18      |
| Household type                          | .079                                                                     | .92 -<br>1.27   | 0.92 | .76      | .079                                          | .92 -<br>1.27   | 0.90 | .34      | .034                                                                     | .88 -<br>1.22   | 0.16 | .69      |
| Household size                          | .041                                                                     | .89 -<br>1.23   | 0.24 | .62      | .041                                          | .89 -<br>1.23   | 0.24 | .62      | .048                                                                     | .89 -<br>1.24   | 0.32 | .57      |
| Highest Education                       | .032                                                                     | .89 -<br>1.19   | 0.18 | .67      | .036                                          | .90 -<br>1.20   | 0.23 | .63      | .000                                                                     | .86 -<br>1.16   | 0.00 | 1.00     |
| Ethnicity ( <i>Base = Chinese</i> )     |                                                                          |                 |      |          |                                               |                 |      |          |                                                                          |                 |      |          |
| Malay                                   | .055                                                                     | .53 -<br>2.11   | 0.02 | .88      | -.032                                         | .48 -<br>1.96   | 0.01 | .93      | -.098                                                                    | .44 -<br>1.86   | 0.07 | .91      |
| Indian                                  | .106                                                                     | .52 -<br>2.37   | 0.08 | .78      | -.003                                         | .46 -<br>2.15   | 0.00 | .99      | -.058                                                                    | .43 -<br>2.05   | 0.02 | .94      |
| Eurasian                                | 1.240                                                                    | .70 -<br>17.02  | 2.32 | .13      | 1.179                                         | .66 -<br>16.08  | 2.09 | .15      | 1.153                                                                    | .63 -<br>16.02  | 1.94 | .16      |
| Others                                  | -.329                                                                    | .16 -<br>3.17   | 0.19 | .66      | -.389                                         | .15 -<br>2.99   | 0.26 | .61      | -.217                                                                    | .18 -<br>3.69   | 0.08 | .78      |
| Marital Status ( <i>Base = Single</i> ) |                                                                          |                 |      |          |                                               |                 |      |          |                                                                          |                 |      |          |
| Dating                                  | .409                                                                     | .82 -<br>2.76   | 1.74 | .19      | .369                                          | .78 -<br>2.67   | 1.39 | .24      | .260                                                                     | .69 -<br>2.42   | 0.66 | .42      |
| Married                                 | -.033                                                                    | .62 -<br>1.52   | 0.02 | .89      | -.015                                         | .64 -<br>1.61   | 0.04 | .95      | -.068                                                                    | .59 -<br>1.49   | 0.08 | .78      |
| Widowed, Separated, Divorced            | .137                                                                     | .47 -<br>2.79   | 0.09 | .76      | .161                                          | .48 -<br>2.87   | 0.13 | .72      | .048                                                                     | .42 -<br>2.61   | 0.01 | .92      |
| Local COVID-19 Cases to date (Log)      |                                                                          |                 |      |          | -.168                                         | .55 -           | 0.57 | .45      | -.197                                                                    | .53 -           | 0.76 | .38      |

|                                          |      | Adoption of contact tracing 2 |               |      |     |        |               |       |         |
|------------------------------------------|------|-------------------------------|---------------|------|-----|--------|---------------|-------|---------|
| Lockdown ( <i>Base = No Lockdown</i> )   |      | -0.450                        | 1.31          | 2.15 | .14 | -0.383 | 1.28          | 1.51  | .22     |
| Number of Behavioral Modifications       |      |                               | .35 -<br>1.16 |      |     | .098   | .37 -<br>1.26 | 13.97 | < .001* |
| Model Statistics:                        |      |                               |               |      |     |        |               |       |         |
| Percentage of users correctly classified | 56.6 |                               |               |      |     |        | 61.0          |       |         |
| Nagelkerke's R <sup>2</sup>              | .048 |                               |               |      |     |        | .090          |       |         |
| * <i>p</i> < 0.05                        |      |                               |               |      |     |        |               |       |         |

Table 3. Characteristics of digital contact tracing users

| Variables                                | TraceTogether Usage       |       |                               |       |
|------------------------------------------|---------------------------|-------|-------------------------------|-------|
|                                          | User<br>( <i>n</i> = 274) |       | Non-user<br>( <i>n</i> = 231) |       |
|                                          | Mean                      | SD    | Mean                          | SD    |
| Age (In Years)                           | 38.57                     | 11.57 | 36.95                         | 10.96 |
| Household type                           | 3.92                      | 1.18  | 3.76                          | 1.21  |
| Household size                           | 3.54                      | 1.26  | 3.53                          | 1.15  |
| Number of Behavioral Changes             | 10.33                     | 3.83  | 8.96                          | 3.65  |
|                                          | <i>n</i>                  | %     | <i>n</i>                      | %     |
| Gender                                   |                           |       |                               |       |
| Female                                   | 177                       | 64.6% | 136                           | 58.9% |
| Male                                     | 97                        | 35.4% | 95                            | 41.1% |
| Citizenship                              |                           |       |                               |       |
| Singaporean                              | 240                       | 87.6% | 216                           | 93.5% |
| Others                                   | 34                        | 12.4% | 15                            | 6.5%  |
| Highest Education                        |                           |       |                               |       |
| No formal education                      | 1                         | 0.4%  | 1                             | 0.4%  |
| Primary School (PSLE)                    | 1                         | 0.4%  | 1                             | 0.4%  |
| Secondary School (O & N Level)           | 15                        | 5.5%  | 8                             | 3.5%  |
| Junior College (A Level)                 | 14                        | 5.1%  | 12                            | 5.2%  |
| Institution of Technical Education (ITE) | 8                         | 2.9%  | 4                             | 1.7%  |
| Polytechnic (Diploma)                    | 41                        | 15.0% | 47                            | 20.3% |
| University (Degree)                      | 136                       | 49.6% | 129                           | 55.8% |
| Post-graduate (Masters / PhD)            | 58                        | 21.2% | 29                            | 12.6% |
| Ethnicity                                |                           |       |                               |       |
| Chinese                                  | 218                       | 79.6% | 194                           | 84.0% |
| Malay                                    | 20                        | 7.3%  | 18                            | 7.8%  |
| Indian                                   | 19                        | 6.9%  | 13                            | 5.6%  |
| Eurasian                                 | 13                        | 4.7%  | 2                             | 0.9%  |
| Others                                   | 4                         | 1.5%  | 4                             | 1.7%  |
| Marital Status                           |                           |       |                               |       |
| Single                                   | 85                        | 31.0% | 85                            | 36.8% |
| Dating                                   | 38                        | 13.9% | 26                            | 11.3% |
| Married                                  | 133                       | 48.5% | 108                           | 46.8% |
| Widowed, Separated, Divorced             | 18                        | 6.6%  | 12                            | 5.2%  |

#### 4.3. Post-Hoc Network Analysis

In the logistic regression models, TraceTogether usage was predicted by the extent to which individuals changed their behaviors because of the pandemic. To understand this association, we conducted further exploratory analyses.

As shown in Figure 1, the majority of participants modified their behaviors to curb the spread of COVID-19. Use of TraceTogether ranked 10th in the frequency of adoption (54.3%) - approximately equal to voluntary mask-wearing (54.7%).

A corollary question is how the use of digital contact tracing relates to other health protective behaviors - that is, how likely are you to adopt TraceTogether if you've modified your behaviors in other ways? To address this question, we conducted network analyses by estimating a mixed graphical model (MGM) via the R package *mgm* (Haslbeck & Waldorp, 2015, 2020). MGM constructs weighted and undirected networks where the pathways between the behaviors represent conditionally dependent associations, having controlled for the other associations in the network. Similar to partial correlations, each association (or 'edge') is the average regression coefficient of two nodes. To avoid false positive findings, we set small associations to 0 for the main models in the paper.

As shown in Figure 2, use of the contact tracing application was associated with hand sanitizer use, avoiding public transport, and a preference for outdoor vs indoor venues. The adjacency matrix (i.e., numerical values for the average regression coefficient between two nodes) for Figure 2 is presented in Appendix 9.1, Table. 1.

(As a sensitivity analysis, we ran a logistic regression with use of the contract tracing application as the dependent variable, and the 18 other behavioral modifications as the predictors. Our conclusions did not change, see Appendix 9.2.)



### Adoption of contact tracing 3

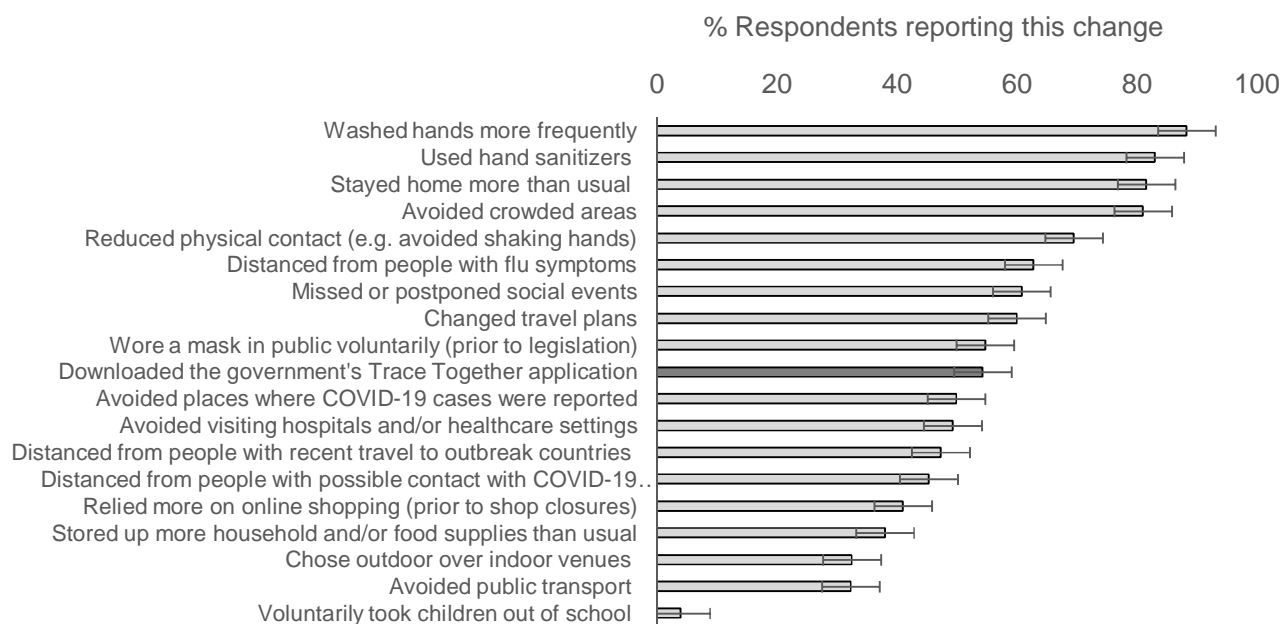

*Figure 1.* Participants reported what behavioural measures – including the use of digital contact tracing – they had undertaken in response to the COVID-19 outbreak. Horizontal lines represent the 95% confidence intervals.

Adoption of contact tracing 4

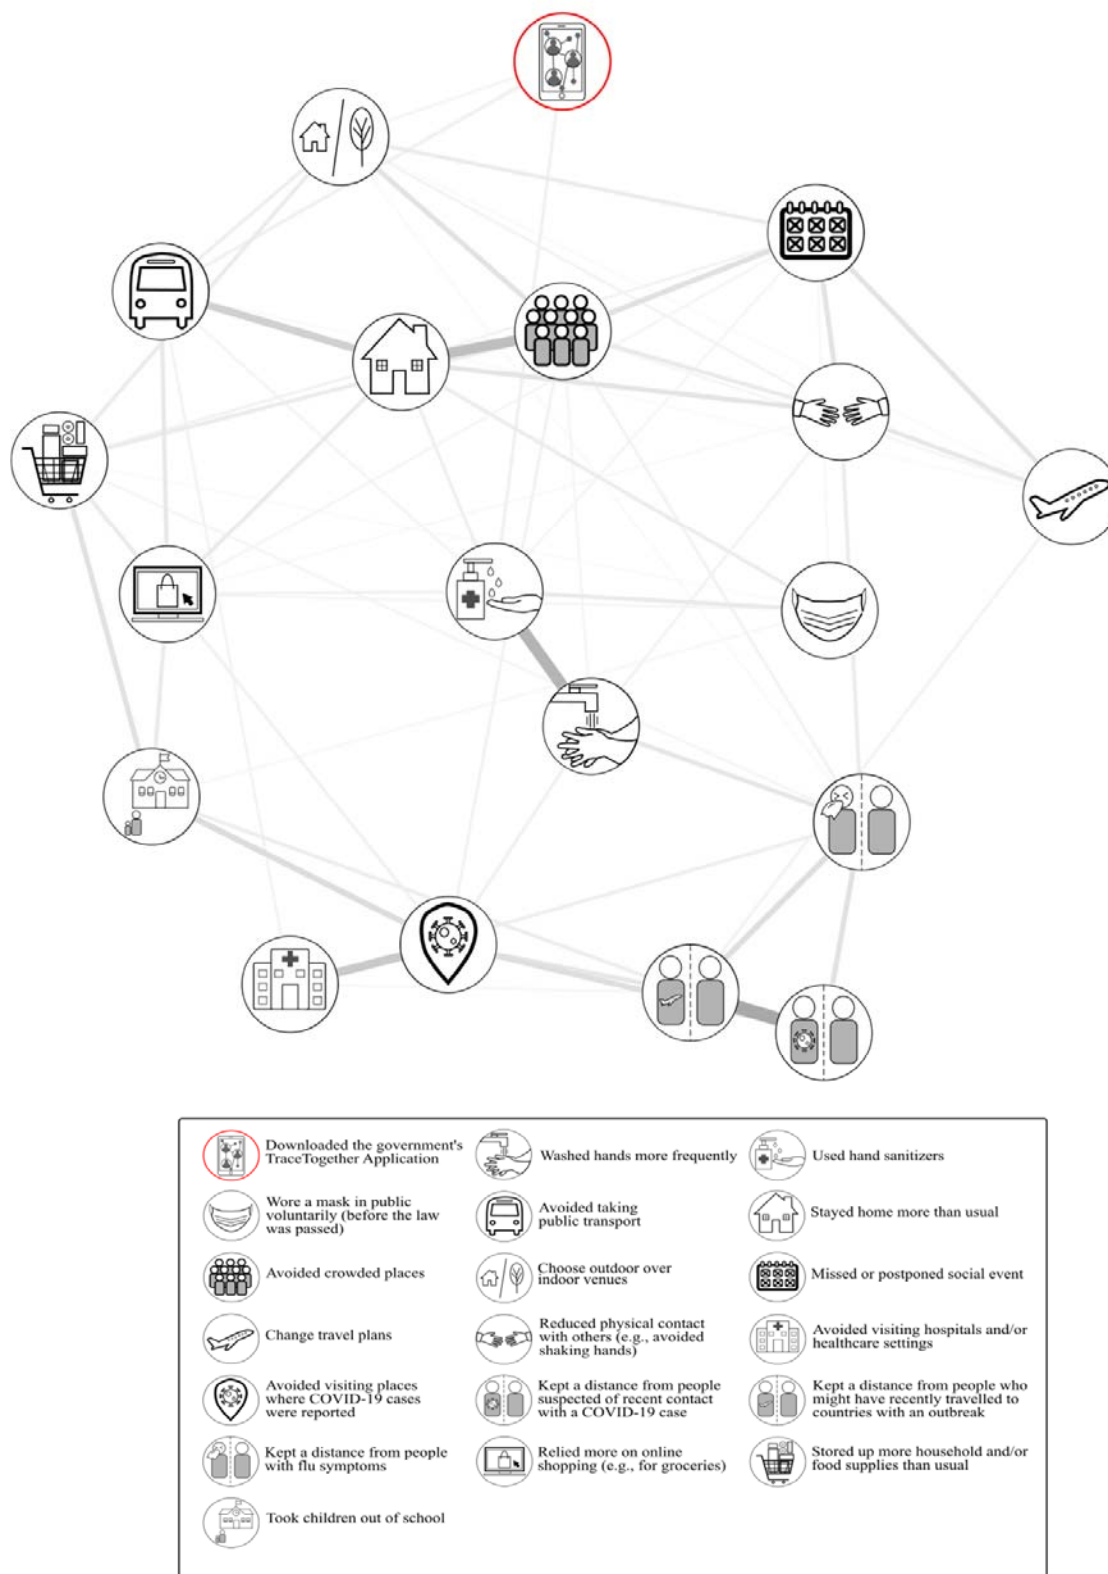

Figure 2. A model depicting how use of a contact tracing mobile application (TraceTogether) relates to other pandemic-related behavioral modifications. Here, line thickness represents the strength of an association.

## 5. Discussion

As lockdowns for COVID-19 ease globally, digital contact tracing will play an increasingly critical role in managing the epidemic curve. Correspondingly, we identified for the first-time sociodemographic factors that predict voluntary use of a contact tracing application. This study was conducted in Singapore - the site where the first government-level application, TraceTogether, was launched.

### 5.1 Behavioral Modifications

As our primary finding, we observed that the number of behavioral modifications significantly predicted use of digital contact tracing. In other words, a person who had already changed his/her lifestyle on account of the pandemic was also likely to download a contact tracing application. One possible explanation may be that conscientiousness underlies both forms of behaviors. In a meta-analysis, Jokela et al. (2013) found that being conscientious was associated with a decreased risk of all-cause mortality. This was in part because conscientious individuals were more likely to adopt health-promoting behaviors (e.g., not smoking, being physically active). Extending to the COVID-19 context, perhaps the conscientious individual readily adopts digital contact tracing as part of a larger spectrum of epidemic control measures. Future studies are necessary to examine the possible links between personality traits and the uptake of digital contact tracing.

At a more fine-grained level, network analyses showed that downloading a contact tracing application clustered with: (i) using hand sanitizers, (ii) avoiding public transport, and (iii) preferring outdoor over indoor venues. Bish and Michie (2010) previously proposed a taxonomy of behavioral modifications undertaken during a pandemic: for example, 'avoidant behaviors' are measures taken to avoid contact with potential carriers (e.g., avoiding crowded places), while 'prevention behaviors' are those associated with maintaining hygiene (e.g., regular handwashing). The use of contact tracing applications cuts across this taxonomy and is linked to *both* avoidant and prevention behaviors. Correspondingly, this may suggest the need to revise classification systems in light of changing technology. Nonetheless, one implication of our finding is that digital contact tracing can be tagged with

the three identified behaviors in official messaging - for example, by printing information about the phone application on hand sanitizer packaging.

## 5.2 Demographic and Situational Factors

Although we identified behavioral modifications as a significant predictor, no demographic (e.g., age, gender) or situational predictor (e.g., number of COVID-19 cases, lockdown status) emerged. This omission is notable: prior to our study, it would have been conceivable that only a subset of the population would download a contact tracing application. For example, when other technological innovations have been introduced (such as medical advice delivered via phone applications), uptake has been predicted by demographic factors such as gender or education level (Karekla et al., 2019; Thorneloe et al., 2020). Similarly, the performance of health-related behaviors has been associated with demographic characteristics (e.g., Long and Liu, 2020).

By contrast, our findings highlight how downloading a contact tracing application cuts across demographic groups. This suggests that demographic-based messaging is not required and is encouraging because behavioral sciences offer widespread measures to 'nudge' the general population (Reisch & Sunstein, 2016). Digital contact tracing is particularly amenable to nudges, since the phone application does not require constant attention. Instead, functions run in the background, and the user only needs to download and set-up the application once. Accordingly, if governments can nudge users for this first step (e.g., by introducing incentives to download, or by introducing contact tracing as an opt-out feature of existing government applications), it may be possible to attain the download rates necessary for contact tracing to be effective.

## 5.3 Limitations

In drawing these conclusions, we note several limitations of our study. First, our survey relied on participants' self-reported use of a contact tracing application. Although our download rate approximates that of the general population, further studies may seek to verify actual usage - for example, by incorporating survey questions into a contact tracing application. Second, we examined TraceTogether, a centralized contact tracing protocol.

Future research will need to examine whether our findings extend to decentralized protocols, or to other forms of digital contact tracing that do not use phone applications (e.g., public acceptance of cloud-based contact in South Korea).

## **6. Conclusion**

To conclude, there is growing recognition that digital technology can contribute to pandemic management. What remains unclear, however, is how this technology is received and how best to promote uptake. Focusing on contact tracing, we found that downloads of a phone application was best predicted by the adoption of other infection control measures such as increased hand hygiene. In other words, introducing digital contact tracing is not merely a call to “TraceTogether” but to “modify together”, to use contact tracing applications as part of the broader spectrum of behavioral modifications during a pandemic.

## **7. Acknowledgements**

This research was funded by a grant awarded to JCJL from the JY Pillay Global Asia Programme (grant number: IG20-SG002).

## 8. References

- Abeler, J., Bäcker, M., Buermeyer, U., & Zillessen, H. (2020). COVID-19 contact tracing and data protection can go together. *JMIR MHealth and UHealth*, 8(4), e19359. <https://doi.org/10.2196/19359>
- Al Jazeera News. (2020, May 27). *Qatar makes COVID-19 app mandatory, experts question efficiency*. <https://www.aljazeera.com/news/2020/05/qatar-covid-19-app-mandatory-experts-question-efficiency-200524201502130.html>
- Anderson, M., & Auxier, B. (2020, April 16). Most Americans don't think cellphone tracking will help limit COVID-19, are divided on whether it's acceptable. *Pew Research Center*. <https://www.pewresearch.org/fact-tank/2020/04/16/most-americans-dont-think-cellphone-tracking-will-help-limit-covid-19-are-divided-on-whether-its-acceptable/>
- Australian Government. (2020, April 24). *COVIDSafe app* [Text]. Australian Government Department of Health; Australian Government Department of Health. <https://www.health.gov.au/resources/apps-and-tools/covidsafe-app>
- Bali, S., Stewart, K. A., & Pate, M. A. (2016). Long shadow of fear in an epidemic: Fearonomic effects of Ebola on the private sector in Nigeria. *BMJ Global Health*, 1(3), e000111. <https://doi.org/10.1136/bmjgh-2016-000111>
- Bay, J., Kek, J., Tan, A., Hau, C. S., Yongquan, L., Tan, J., & Quy, T. A. (2020). BlueTrace: A privacy-preserving protocol for community-driven contact tracing across borders. *Government Technology Agency*.
- Betsch, C., Wieler, L. H., & Habersaat, K. (2020). Monitoring behavioural insights related to COVID-19. *The Lancet*, 395(10232), 1255–1256. [https://doi.org/10.1016/S0140-6736\(20\)30729-7](https://doi.org/10.1016/S0140-6736(20)30729-7)
- Bish, A., & Michie, S. (2010). Demographic and attitudinal determinants of protective behaviours during a pandemic: A review. *British Journal of Health Psychology*, 15(4), 797–824. <https://doi.org/10.1348/135910710X485826>

- Blanchard, O., Philippon, T., & Pisani-Ferry, J. (2020). A new policy toolkit is needed as countries exit COVID-19 lockdowns. *Policy Contribution*, 12/2020, Bruegel.
- Chan, S. (2020, July 14). COVID-19 contact tracing apps reach 9% adoption in most populous countries. *SensorTower*. <https://sensortower.com/blog/contact-tracing-app-adoption>
- Chen, K.-M., Li, C.-H., Lin, J.-N., Chen, W.-T., Lin, H.-S., & Wu, H.-C. (2007). A feasible method to enhance and maintain the health of elderly living in long-term care facilities through long-term, simplified tai chi exercises. *Journal of Nursing Research*, 15(2), 156–164. <https://doi.org/10.1097/01.JNR.0000387610.78273.db>
- Criddle, C., & Kelion, L. (2020, May 7). Coronavirus contact-tracing: World split between two types of app. *BBC News*. <https://www.bbc.com/news/technology-52355028>
- Etherington, D. (2020, May 21). Apple and Google launch exposure notification API, enabling public health authorities to release apps. *Techcrunch*. <https://techcrunch.com/2020/05/20/apple-and-google-launch-exposure-notification-api-enabling-public-health-authorities-to-release-apps/>
- Fernandes, N. (2020). Economic Effects of Coronavirus Outbreak (COVID-19) on the World Economy (SSRN Scholarly Paper ID 3557504). *Social Science Research Network*. <https://doi.org/10.2139/ssrn.3557504>
- Ferretti, L., Wymant, C., Kendall, M., Zhao, L., Nurtay, A., Abeler-Dörner, L., Parker, M., Bonsall, D., & Fraser, C. (2020). Quantifying SARS-CoV-2 transmission suggests epidemic control with digital contact tracing. *Science*, 368(6491). <https://doi.org/10.1126/science.abb6936>
- Google. (n.d.). Exposure Notifications: Using technology to help public health authorities fight COVID-19 [COVID-19 information & resources]. *Google*. <https://www.google.com/covid19/exposurenotifications/>

- GovTech. (2020, April 9). 6 things about OpenTrace, the open-source code published by the TraceTogether team [A Singapore Government Agency Website]. *GovTech Singapore*. <https://www.tech.gov.sg/media/technews/six-things-about-opentrace>
- Haslbeck, J. M. B., & Waldorp, L. J. (2015). *Structure estimation for mixed graphical models in high-dimensional data*. *ArXiv: Applications*. <http://arxiv.org/pdf/1510.05677.pdf>
- Haslbeck, J. M. B., & Waldorp, L. J. (2020). mgm: Estimating Time-Varying Mixed Graphical Models in High-Dimensional Data. *Journal of Statistical Software*, 93(8). <https://doi.org/10.18637/jss.v093.i08>
- Hellewell, J., Abbott, S., Gimma, A., Bosse, N. I., Jarvis, C. I., Russell, T. W., Munday, J. D., Kucharski, A. J., Edmunds, W. J., Sun, F., Flasche, S., Quilty, B. J., Davies, N., Liu, Y., Clifford, S., Klepac, P., Jit, M., Diamond, C., Gibbs, H., . (2020). Feasibility of controlling COVID-19 outbreaks by isolation of cases and contacts. *The Lancet Global Health*, 8(4), e488–e496. [https://doi.org/10.1016/S2214-109X\(20\)30074-7](https://doi.org/10.1016/S2214-109X(20)30074-7)
- Hinch, R., Probert, W., Nurtay, A., Kendall, M., Wymant, C., Hall, M., Lythgoe, K., Cruz, A. B., Zhao, L., Stewart, A., Ferretti, L., Parker, M., Meroueh, A., Mathias, B., Stevenson, S., Montero, D., Warren, J., Mather, N. K., Finkelstein, A., et al. (2020). *Effective Configurations of a Digital Contact Tracing App: A report to NHSX*. [https://cdn.theconversation.com/static\\_files/files/1009/Report\\_-\\_Effective\\_App\\_Configurations.pdf?1587531217](https://cdn.theconversation.com/static_files/files/1009/Report_-_Effective_App_Configurations.pdf?1587531217)
- Ienca, M., & Vayena, E. (2020). On the responsible use of digital data to tackle the COVID-19 pandemic. *Nature Medicine*, 26(4), 463–464. <https://doi.org/10.1038/s41591-020-0832-5>
- Jokela, M., Batty, G. D., Nyberg, S. T., Virtanen, M., Nabi, H., Singh-Manoux, A., & Kivimäki, M. (2013). Personality and all-cause mortality: Individual-participant meta-analysis of 3,947 deaths in 76,150 adults. *American Journal of Epidemiology*, 178(5), 667–675. <https://doi.org/10.1093/aje/kwt170>
- Karekla, M., Kasinopoulos, O., Neto, D. D., Ebert, D. D., Van Daele, T., Nordgreen, T., Höfer, S., Oeverland, S., & Jensen, K. L. (2019). Best practices and



- recommendations for digital interventions to improve engagement and adherence in chronic illness sufferers. *European Psychologist*, 24(1), 49–67. <https://doi.org/10.1027/1016-9040/a000349>
- Keeling, M. J., Hollingsworth, T. D., & Read, J. M. (2020). Efficacy of contact tracing for the containment of the 2019 novel coronavirus (COVID-19). *Journal of Epidemiology and Community Health*. <https://doi.org/10.1136/jech-2020-214051>
- Kretzschmar, M. E., Rozhnova, G., Bootsma, M. C. J., van Boven, M., van de Wijgert, J. H. H. M., & Bonten, M. J. M. (2020). Impact of delays on effectiveness of contact tracing strategies for COVID-19: A modelling study. *The Lancet Public Health*. [https://doi.org/10.1016/S2468-2667\(20\)30157-2](https://doi.org/10.1016/S2468-2667(20)30157-2)
- Lau, H., Khosrawipour, V., Kocbach, P., Mikolajczyk, A., Schubert, J., Bania, J., & Khosrawipour, T. (2020). The positive impact of lockdown in Wuhan on containing the COVID-19 outbreak in China. *Journal of Travel Medicine*, 27(3). <https://doi.org/10.1093/jtm/taaa037>
- Legido-Quigley, H., Asgari, N., Teo, Y. Y., Leung, G. M., Oshitani, H., Fukuda, K., Cook, A. R., Hsu, L. Y., Shibuya, K., & Heymann, D. (2020). Are high-performing health systems resilient against the COVID-19 epidemic? *The Lancet*, 395(10227), 848–850. [https://doi.org/10.1016/S0140-6736\(20\)30551-1](https://doi.org/10.1016/S0140-6736(20)30551-1)
- Liu, J. C., & Tong, E. M. (2020). COVID-19 news exposure as a modifiable risk factor of psychological symptoms: Can an official WhatsApp channel help? [Preprint]. *Journal of Medical Internet Research*. <https://doi.org/10.2196/preprints.22142>
- Long, V. J., & Liu, J. C. (2020). Behavioural changes during the COVID-19 pandemic: Results of a national survey in Singapore [preprint]. *MedRxiv*, 2020.08.06.20169870. <https://doi.org/10.1101/2020.08.06.20169870>
- Mahmud, A. H. (2020, March 8). 'Like an invisible criminal': How police helped find missing link between COVID-19 church clusters in a day. *Channel NewsAsia*. <https://www.channelnewsasia.com/news/singapore/police-missing-link-church-clusters-covid19-coronavirus-12509492>

- Morgan, A. U., Balachandran, M., Do, D., Lam, D., Parambath, Chaiyachati, K. H., Bonalumi, N. M., Day, S. C., Lee, K. C., & Asch, D. A. (2020). Remote monitoring of patients with Covid-19: Design, implementation, and outcomes of the first 3,000 patients in COVID Watch. *NEJM Catalyst Innovations in Care Delivery*. <https://catalyst.nejm.org/doi/abs/10.1056/CAT.20.0342>
- Niehus, R., Salazar, P. M. D., Taylor, A., & Lipsitch, M. (2020). Quantifying bias of COVID-19 prevalence and severity estimates in Wuhan, China that depend on reported cases in international travelers. *MedRxiv*, 2020.02.13.20022707. <https://doi.org/10.1101/2020.02.13.20022707>
- Reelfs, J. H., Hohlfeld, O., & Poese, I. (2020). Corona-Warn-App: Tracing the start of the official COVID-19 exposure notification app for Germany. *ArXiv:2008.07370 [Cs]*. <https://doi.org/10.1145/3405837.3411378>
- Reisch, L. A., & Sunstein, C. R. (2016). Do Europeans like nudges? *SSRN Electronic Journal*. <https://doi.org/10.2139/ssrn.2739118>
- Reuters. (2020, June 10). How Singapore's Covid-19 contact tracing app drew inspiration from a US high school project [Scmp]. *The Coronavirus Pandemic*. <https://www.scmp.com/news/asia/southeast-asia/article/3088389/how-singapores-covid-19-contact-tracing-app-drew>
- Rubin, R. (2020). Building an "Army of Disease Detectives" to trace COVID-19 contacts. *JAMA*, 323(23), 2357. <https://doi.org/10.1001/jama.2020.8880>
- Thorneloe, R., Epton, T., Fynn, W., Daly, M., Stanulewicz, N., Kassianos, A., Shorter, G. W., Moll, S.-J., Campbell, M., Sodergren, S. C., Chapman, S., Sutherland, L., Armitage, C., Arden, M. A., Chater, A., Byrne-Davis, L., & Hart, J. (2020). Scoping review of mobile phone app uptake and engagement to inform digital contact tracing tools for COVID-19 [Preprint]. *PsyArXiv*. <https://doi.org/10.31234/osf.io/qe9b6>
- TraceTogether*. (2020). [A Singapore Government Agency Website]. TraceTogether, Safer Together. <https://www.tracetgether.gov.sg>

- Vaswani, K. (2020, March 19). How Singapore stayed one step ahead of the virus. *BBC News*. <https://www.bbc.com/news/world-asia-51866102>
- Vinck, P., Pham, P. N., Bindu, K. K., Bedford, J., & Nilles, E. J. (2019). Institutional trust and misinformation in the response to the 2018–19 Ebola outbreak in North Kivu, DR Congo: A population-based survey. *The Lancet Infectious Diseases*, 19(5), 529–536. [https://doi.org/10.1016/S1473-3099\(19\)30063-5](https://doi.org/10.1016/S1473-3099(19)30063-5)
- World Health Organisation. (2020, March 11). WHO Director-General’s opening remarks at the media briefing on COVID-19—11 March 2020. *World Health Organisation*. <https://www.who.int/dg/speeches/detail/who-director-general-s-opening-remarks-at-the-media-briefing-on-covid-19---11-march-2020>
- Worldometer. (n.d.). *Coronavirus Update (Live)*. Worldometer. Retrieved August 25, 2020, from <https://www.worldometers.info/coronavirus/>
